# Supplementary material
Source: publisher site journal article supplement (https://www.degruyterbrill.com/publication/journal_key/CLS/downloadAsset/CLS_CFP%20Thematic%20Symposium%20Integrity%20of%20Mechanical%20Structures%20and%20Material.pdf)
Supplement: Supplementary file 1 [file CLS_CFP%20Thematic%20Symposium%20Integrity%20of%20Mechanical%20Structures%20and%20Material.pdf]

# Thematic Symposium - Integrity of Mechanical Structures and Material

## Special Issue of the Selected Papers in TS-IMSM 2024

### GUEST EDITORS

---

**Aditya Rio Prabowo**, Universitas Sebelas Maret, Indonesia

**Indri Yaningsih**, Universitas Sebelas Maret, Indonesia

**Moritz Braun**, German Aerospace Center (DLR), Germany

**František Mikšík**, Nagoya University, Japan

### DESCRIPTION

---

*Curved and Layered Structures* invites manuscripts for the Special Issue published in cooperation with **The 3rd Thematic Symposium Integrity of Mechanical Structure and Material**.

**Thematic Symposium - Integrity of Mechanical Structures and Material (TS-IMSM 2024)** will be held on September 19-20, 2024 in Surakarta, Indonesia, for the third time since it was firstly introduced in 2020 by cooperation with DIMONITOR® as the Host. The aim of the **Thematic Symposium** is structure-energy collaboration towards sustainable societies.

Scopes of Special Issue are selected to be recent developments of the thin-walled based designs and structures. Topics of interests include (but are not limited) to the following aspects:

- Mechanics of Fluid, Solid, Material and Thermal
- Engineering Structure and Construction
- Experimental Modeling and Applied Engineering
- Manufacture and Production
- Mechanical and Automotive Design
- Wind Engineering
- Aerospace Engineering
- Mechanical Engineering

More information about the Conference, such as deadlines and preliminary schedule, can be accessed at <https://tsimsm.org/>.

Authors are requested to submit their papers complying the general scope of the journal. The submitted papers will undergo the standard peer-review process before they can be accepted. Notification of acceptance will be communicated as we progress with the review process.

## HOW TO SUBMIT

---

Before submission authors should carefully read the [Instruction for Authors](#).

Manuscripts can be written in TeX, LaTeX, or in standard DOCUMENT (.DOC). **For an initial submission, the authors are strongly advised to upload their entire manuscript, including tables and figures, as a single PDF file.**

All submissions to the Special Issue must be made electronically via online submission system Editorial Manager: <https://www.editorialmanager.com/clstructures>.

All manuscripts will undergo the standard peer-review process (single blind, at least two independent reviewers). When entering your submission via online submission system please choose the option "**Special Issue: TS-IMSM 2024**".

Submission of a manuscript implies that the work described has not been published before as a whole or as a part in any medium by the authors or anyone else and it is not under consideration for publication elsewhere. For more details please see [Publishing Ethics](#) and documents available in the Supplementary Materials section at the [Curved and Layered Structures](#) website.

**The deadline for submissions is December 31, 2024**, but individual papers will be reviewed and published online on an ongoing basis.

Contributors to the Special Issue will benefit from:

- **indexation in SCOPUS and Web of Science**
- APC that amounts to 500 EUR
- fair and constructive peer review provided by experts in the field no space constraints
- convenient, web-based paper submission and tracking system – Editorial Manager
- quick online publication upon completing the publishing process (continuous publication model)
- **liberal policies on copyrights** (authors retain copyrights) and on self-archiving (no embargo periods) \*\*
- better visibility due to Open Access
- long-term preservation of the content
- promotion of published papers to readers and citers

\*\* The use of article will be governed by the Creative-Commons Attribution license (CC-BY) [License to Publish document](#) (in PDF)

[Curved and Layered Structures](#) applies Article Processing Charges (APC), to cover costs of publication in open access. There is no submission fee.

**We are looking forward to your submission!**

In case of problems, please contact the Managing Editor ([natalia.mikolajczak@degruyter.com](mailto:natalia.mikolajczak@degruyter.com)) or Assistant Managing Editor ([AssistantManagingEditor@degruyter.com](mailto:AssistantManagingEditor@degruyter.com)) of [Curved and Layered Structures](#).

**[degruyter.com/view/j/cls](https://degruyter.com/view/j/cls)**
